# 1 Accuracy, limitations and cost-efficiency of 2 eDNA-based community survey in tropical frogs

3

4 Miklós Bálint<sup>1,2</sup>, Carsten Nowak<sup>1,2</sup>, Orsolya Márton<sup>1,3</sup>, Steffen U. Pauls<sup>1,2</sup>, Claudia  
5 Wittwer<sup>1</sup>, Jose Luis Aramayo B.<sup>4</sup>, Arne Schulze<sup>5</sup>, Thierry Chambert<sup>6</sup>, Berardino Cocchiararo<sup>1,2</sup>,  
6 Martin Jansen<sup>1</sup>

7

8 <sup>1</sup>Senckenberg Research Institute and Natural History Museum Frankfurt,  
9 Senckenberganlage 25, 60325 Frankfurt, Germany

10 <sup>2</sup>LOEWE Centre for Translational Biodiversity Genomics (LOEWE-TBG),  
11 Senckenberganlage 25, 60325 Frankfurt, Germany

12 <sup>3</sup>Institute for Soil Sciences and Agricultural Chemistry, Centre for Agricultural Research,  
13 Hungarian Academy of Sciences, Herman Otto str. 15, H-1022 Budapest, Hungary

14 <sup>4</sup>Museo Historia Natural Noel Kempff Mercado (Universidad Autónoma Gabriel Rene  
15 Moreno), Av. Irala 565, Santa Cruz de la Sierra, Bolivia

16 <sup>5</sup>Hessisches Landesmuseum Darmstadt (HLMD), Friedensplatz 1, 64283 Darmstadt,  
17 Germany

18 <sup>6</sup>Pennsylvania State University, Department of Ecosystem Science and Management,  
19 University Park, PA 16802, USA

## 20 Abstract

21Rapid environmental change in highly biodiverse tropical regions demands efficient  
22biomonitoring programs. While existing metrics of species diversity and community composition  
23rely on encounter-based survey data, eDNA recently emerged as alternative approach. Costs  
24and ecological value of eDNA-based methods have rarely been evaluated in tropical regions,  
25where high species richness is accompanied by high functional diversity (e.g. the use of  
26different microhabitats by different species and life-stages). We first tested whether estimation  
27of tropical frogs' community structure derived from eDNA data is compatible with expert field  
28assessments. Next we evaluated whether eDNA is a financially viable solution for biodiversity  
29monitoring in tropical regions. We applied eDNA metabarcoding to investigate frog species  
30occurrence in five ponds in the Chiquitano dry forest region in Bolivia and compared our data  
31with a simultaneous visual and audio encounter survey (VAES). We found that taxon lists and  
32community structure generated with eDNA and VAES correspond closely, and most deviations  
33are attributable to different species' life histories. Cost efficiency of eDNA surveys was mostly  
34influenced by the richness of local fauna and the number of surveyed sites: VAES may be less  
35costly in low-diversity regions, but eDNA quickly becomes more cost-efficient in high-diversity  
36regions with many sites sampled. The results highlight that eDNA is suitable for large-scale  
37biodiversity surveys in high-diversity areas if life history is considered, and certain precautions in  
38sampling, genetic analyses and data interpretation are taken. We anticipate that spatially  
39extensive, standardized eDNA biodiversity surveys will quickly emerge in the future.

## 40 Keywords

41 Amphibians, metabarcoding, tropical biodiversity, conservation, community ecology, cost  
42comparison

## 43 Introduction

44 Improvements on most biodiversity loss indicators lag behind the 20 “Aichi Biodiversity  
45Targets” (UNEP 2016) that aim to reduce the decline of biodiversity by 2020 (Tittensor *et al.*  
462014). An important component of the biodiversity crisis is the extinction of species. Based on  
47current trends in mammals, birds, reptiles and amphibians, it has been projected that the  
48biodiversity crisis may lead to the 6th Mass Extinction over the next three centuries if all  
49threatened species go extinct (Barnosky *et al.* 2011). Current rates of extinction may even be  
50much higher if one considers the extinction that likely occurred during the last few decades-  
51centuries, but went unnoticed because the now-extinct species had small ranges, were never  
52described or only described on the eve of their extinction (Pimm *et al.* 2014; Lees & Pimm  
532015). It is however difficult to assess which species are endangered and to what extent. First,  
54most taxa remain poorly described: in some highly diverse regions many species will likely go  
55extinct before they are discovered (Costello *et al.* 2013; Lees & Pimm 2015). Second, cryptic  
56genetic diversity is common within morphospecies (Pfenninger & Schwenk 2007; Pauls *et al.*  
572013), and global change may impact cryptic diversity more severely than morphospecies  
58(Bálint *et al.* 2011). Third, data on population-level trends is scarce, even for well-known species  
59(Butchart *et al.* 2010). Better population-level biodiversity data is thus urgently needed to 1)  
60understand biodiversity patterns and extinction threats, 2) improve forecasting abilities about  
61future biodiversity, and 3) improve humanity’s responses to the challenges of biodiversity loss.  
62This data is crucial in times when conservation action is increasingly demanded by society  
63(Tittensor *et al.* 2014).

64 The importance of internationally coordinated, standardized biodiversity data collection is  
65long recognized both in science and in conservation (Henry *et al.* 2008). This is particularly true  
66for the most biodiverse areas. The tropics are generally underrepresented in ecological studies

67(Clarke *et al.* 2017; Stroud & Feeley 2017). In addition, encounter-based data collection is  
68logistically challenging since it needs considerable funds to bring enough specialists for different  
69organismic groups to remote areas, thus insufficient funds and expertise often limit  
70comprehensive surveys. Indirect species records through environmental DNA are increasingly  
71heralded as an alternative to encounter-based surveys (Thomsen & Willerslev 2015; Pedersen  
72*et al.* 2015). eDNA also facilitates the standardization of biodiversity surveys at both regional  
73and global scales since community composition data can be obtained by high-throughput-  
74sequencing of standardized, taxonomically informative marker genes (metabarcoding) (Taberlet  
75*et al.* 2012a; Cristescu 2014). Aquatic or semiaquatic vertebrates such as frogs and other  
76amphibians or fish have been early targets of eDNA based studies, either focusing on the  
77detection of single species (e.g. Ficetola *et al.* 2008; Goldberg *et al.* 2011; Jerde *et al.* 2011;  
78Thomsen *et al.* 2012a) or entire communities (e.g. Thomsen *et al.* 2012b; Valentini *et al.* 2016;  
79Shaw *et al.* 2016; Yamamoto *et al.* 2017). The use of next-generation sequencing approaches  
80led to a boost in data acquisition (Taberlet *et al.* 2012b) and is considered to make important  
81contributions to biodiversity research (Rees *et al.* 2014; Bohmann *et al.* 2014). eDNA-based  
82metabarcoding may present one of several tools needed to globally coordinate initiatives for  
83ecosystem monitoring and sustainable management (Bush *et al.* 2017; Schmeller *et al.* 2017).

84        In this study we evaluate whether eDNA metabarcoding is suitable for inventories of  
85frogs, a group with particular high species-diversity in tropical regions. Frogs and other  
86amphibians are sentinel victims of the biodiversity crisis: more than one-third of the  
87approximately 7500 described species are endangered (Stuart *et al.* 2004; Bishop *et al.* 2012;  
88Whittaker *et al.* 2013). Frogs are also known for being a highly diverse, but incompletely  
89described taxon, especially in the tropics (Ferrão *et al.* 2016; Caminer *et al.* 2017). Many  
90“widespread” morphospecies harbor considerable cryptic genetic diversity and are better  
91considered complexes of closely related species with much smaller ranges (Fouquet *et al.* 2007;

92Gehara *et al.* 2013, 2014; Ortega-Andrade *et al.* 2015). Efficient implementation of amphibian  
93conservation measures (e.g. the prioritization of areas for conservation, or informing society and  
94stakeholders about conservation needs) are only possible with geographically broad-scaled  
95fine-grain, taxonomically well-resolved faunistic data, but our current understanding of present  
96and future amphibian biodiversity is often based on rare, spatially and temporally scattered  
97observations of phenotypically defined taxa.

98       First efforts have been made to test the suitability of eDNA for the survey of tropical frog  
99biodiversity (Lopes *et al.* 2016), but important practical aspects remain unaddressed. First, it is  
100not clear which fraction of the local species pool is represented by amphibian eDNA in tropical  
101water bodies. Existing comparisons of encounter-based surveys and eDNA either do not include  
102non-adult life stages, or they use already compiled fauna lists for the evaluation of eDNA  
103performance without consideration of life history traits or behavioral aspects at the moment of  
104sampling. However, temporal and spatial patterns of microhabitat use by frogs is largely  
105species-specific and influenced by phenology and reproduction modes (e.g. Duellmann & Pyles  
1061983, Haddad & Prado 2005, Wells 2010), which can induce strong biases in biodiversity data  
107(Petitot *et al.* 2014). Second, the degree to which aquatic eDNA can provide accurate  
108assessments of community structure remains largely unevaluated. Most studies to date have  
109only investigated the correspondence between encounter-based and metabarcoded taxon lists  
110(Miya *et al.* 2015; Valentini *et al.* 2016), although community structure assessments themselves  
111may be of higher importance for many applications (Ji *et al.* 2013; Elbrecht *et al.* 2017). Third, it  
112is not clear whether, and under what conditions eDNA is financially efficient since comparisons  
113are lacking (Lopes *et al.* 2016), although these comparisons are essential for deciding on data  
114collection strategies.

115       Here we address whether 1) detectability of tropical amphibians with eDNA is linked to  
116species' life history, and 2) eDNA sampling provides accurate data for the characterization of

117community assembly. Finally, we present a framework for cost comparisons between  
118encounter- and eDNA-based biodiversity survey that may be adapted to other systems beyond  
119amphibians. We compare the results of long- and short-term encounter-based field surveys, and  
120an eDNA survey of tropical amphibians in a well-characterized high-diversity area in Bolivia.

121

122

## 123        **Materials and methods**

124        The study area is located the Chiquitano region of Bolivia, a forest-savanna ecotone  
125between Amazon, Cerrado and Gran Chaco in a transition zone among humid and dry forests  
126that are special in regard to their taxonomic and functional diversity (Castro *et al.* 1999). The  
127region contains the largest intact, old-growth block of seasonally dry tropical forests in South  
128America (Miles *et al.* 2006; Power *et al.* 2016). Samples were collected from ponds in the  
129vicinity of the Biological Station “Centro de Investigaciones Ecológicas Chiquitos” on the San  
130Sebastián cattle ranch (S16.3622, W62.00225, 500 m a.s.l.), 24 km south of the town of  
131Concepción, Province of Ñuflo de Chávez, Santa Cruz Department, Bolivia. A description of the  
132area is given by Schulze *et al.* (2009). This area is well characterized with respect to  
133amphibians, including both larvae and adults (Schulze *et al.* 2015). Intensive long-term  
134assessments have resulted in the detection of 45 frog species in the area (e.g. Jansen 2009;  
135Schulze *et al.* 2009, 2015; Jansen *et al.* 2011), as well as the discovery of cryptic intraspecific  
136diversity (e.g. Jansen *et al.* 2011; Jansen *et al.* 2016).

137        We sampled five ponds (T1 – T5) for this study between 19 and 23 November 2014 (see  
138also section “Site and ponds” in the Supplemental information). At these ponds, 35 species  
139have been recorded in previous long-term surveys. Water samples were obtained from three  
140sampling points at each pond (Fig. 1): These water samples consisted of four liters of water  
141collected into two two-liter silicon bottles. One sample of 2 x 2 liters was taken at each sampling  
142point of ponds T1 - T4. Three samples of 2 x 2 liters were taken on each sampling points of  
143pond T5 to check for sampling variation, i.e. whether replication in the sampling records more  
144variation in community composition compared to replication in PCR steps. We also sampled and  
145filtered water from two field controls: Tap water from the station from a covered well, and water

146 from an aquarium with tadpoles of *Leptodactylus vastus* at the station. The water samples were  
147 filtered at the station immediately after collection.

148 Samples were filtrated with a vacuum filtration unit (Duran Group, Wertheim, Germany),  
149 which was connected to a vacuum membrane pump (Laboport, both Carl Roth GmbH + Co. KG,  
150 Karlsruhe, Germany). Filtration was performed until complete clogging of the filters. For each  
151 sample, the water from the two bottles was filtered separately on two glass-fiber filters (GFF,  
152 pore size 2  $\mu\text{m}$ ). One of the filters was preserved in CTAB (A), the other filter was dried  
153 immediately (B). Our intention here was to evaluate if filter preservation influences species  
154 detection, since the transportation of dry filters may be considerably simpler compared to wet  
155 filters. The flow-through from the two GFF filtrations was combined and filtered with a nylon filter  
156 until clogging (NF, pore size 0.2  $\mu\text{m}$ , Millipore, Merck, Darmstadt, Germany). This filter was  
157 immediately dried after filtration (C). We intended to evaluate if the larger pore-size filters  
158 sufficiently capture anuran eDNA, or finer pore filters allow for additional species detection. To  
159 avoid cross-contamination we changed gloves with every new sample and disinfected hands  
160 with ethanol (96%), as well we cleaned filtration unit with ethanol (96%) after each pond or site.

161 Combined visual and audio encounter surveys (VAES, Zimmerman 1994), and a tadpole  
162 survey (TS, Schulze *et al.* 2015) were conducted by experienced observers (MJ and AS) to  
163 generate a presence/absence matrix of species for each pond. Frogs surveys were performed  
164 at night (between 21:00 and 00:30 hours) during 0.5 - 1 hrs transect walks along the ponds to  
165 detect and identify specimens in vegetation, in water and on the ground around ponds.  
166 Detections occurred from either visual (using flashlights and headlamps) or auditory species  
167 identification. Tadpoles were sampled with dip nets once during daytime and once at night in  
168 each pond as well as the riparian vegetation.



169 eDNA samples were processed in Germany in a laboratory dedicated to the pre-PCR  
170 handling of environmental DNA samples. Several working routines have been implemented in  
171 the laboratory to avoid contamination of samples and reactions, including spatial separation  
172 from the other DNA facilities (separate room), strict decontamination protocols using UV light  
173 and bleach, physical separation of extraction and PCR work spaces, automated extraction, and  
174 restricted access to staff trained in the handling and analysis of forensic and environmental  
175 samples.

176 DNA was extracted from GFF samples (A, B, see above) with a CTAB chloroform  
177 extraction method according to Strand *et al.* (2014) and Wittwer *et al.* (2017). Dried nylon filters  
178 (C) were extracted with DNeasy Blood & Tissue Kit (Qiagen, Hilden, Germany) following  
179 Thomsen *et al.* (2012b). Negative controls were included in all extraction sessions (see also  
180 DNA extraction in the Supplemental information). The barcode amplification targeted  
181 mitochondrial 16S ribosomal DNA. We designed primers (see Primer design in Supplemental  
182 information for details on design and primer tests) for a 150 bp fragment with the reference  
183 database of local species (sequences from 159 specimens, Jansen *et al.* 2011; Schulze *et al.*  
184 2015). The primers were tested on a subset of 12 species. PCRs were run on 96-well plates in  
185 15- $\mu$ l reaction volumes with a touchdown protocol, with four technical PCR replicates per  
186 sample (see PCR setup in the Supplemental information for PCR protocol and cycling  
187 conditions). We included four negative PCR controls (ultra-sterile water), four extraction blanks,  
188 and two positive controls on each plate. Positive controls consisted of 1) equimolar positives  
189 where DNA of the twelve frog species (primer development) was pooled in equimolar  
190 concentration (5 ng/ $\mu$ l), and 2) non-equimolar positives where a concentration series was used  
191 by diluting the 5 ng/ $\mu$ l templates 1x to 512x dilution. PCR replicates were individually labeled  
192 with multiplexing indices designed by Kozarewa and Turner (2011). PCR products were purified  
193 with Agencourt AMPure XP SPRI magnetic beads (Beckman Coulter, Brea, CA), pooled in

194equal volumes, and paired-end-sequenced (2 x 150 bp) on an Illumina NextSeq 500 sequencer  
195at StarSEQ GmbH (Mainz, Germany).

196 The bioinformatic pipeline for sequence processing mostly relied on OBITools v1.2.0  
197(Boyer *et al.* 2016, see Sequence processing in the Supplemental information for details). We  
198performed two reference-based taxonomic assignments, first with a custom database of 16S  
199sequences of 159 specimens from the regional amphibian fauna (16S\_custom), and second  
200with all 16S sequences found in the EMBL (release 125, 16S\_EMBL). Further filtering was done  
201in R (R Core Team 2017) with a script supplied on GitHub:  
202<https://github.com/MikiBalint/amphibian-eDNA>. This includes an ordination of all PCR replicates,  
203negative and positive controls. This ordination was used to identify outlier replicates of samples  
204from different ponds (Supplemental Fig. S1).

205 We followed recommendations for the statistical analyses of marker gene community  
206data (Bálint *et al.* 2016). eDNA faunistic differences among the five ponds were visualized with a  
207latent variable model-based ordination in R ('boral', Hui *et al.* 2015), and tested with  
208multispecies generalized linear models (GLMs in 'mvabund', Wang *et al.* 2012). We used read  
209abundances as input data for the boral ordination and the multispecies GLMs since presence-  
210absences inferred from read abundances may overestimate the importance of rare sequence  
211variants on community structure (Bálint *et al.* 2016). Different filtrates were included as distinct  
212samples into the analyses since we wanted to see the variation among closely related samples  
213(e.g. the three filtrates taken at the same point of a pond) *versus* the variation among distinct  
214samples (e.g. originating from different ponds). We assumed a negative binomial distribution for  
215both boral and mvabund analyses since read abundances are overdispersed counts, with a  
216strong uniform prior on the dispersion parameter in boral (0-3). The surveyed ponds were  
217markedly different in size, vegetation, water depth, etc, thus we considered pond identity as a  
218good predictor of community composition. The pond effect was evaluated with analysis of

219variance (likelihood-ratio test, PIT-trap resampling, 1 000 bootstrap replicates). We performed a  
220model-based ordination also for the VAES presence/absence data (since no abundance data  
221was collected during the VAES), and then used a Procrustean superimposition (Peres-Neto &  
222Jackson 2001) to evaluate how the VAES-based ordination of ponds matches the ordination of  
223centroids of eDNA samples. We compared the efficiency of filter preservation (CTAB or dried)  
224on the successful detection of species with a site occupancy model (MacKenzie *et al.* 2002;  
225Bailey *et al.* 2014), implemented in the R package 'unmarked' (Fiske *et al.* 2011). We used the  
226single season false-positive occupancy model developed by Miller *et al.* (2011, for details see  
227Site occupancy models in Supplemental information).

228       For cost comparisons, we considered a typical eDNA survey scenario: samples are  
229collected in the field and later processed in a dedicated laboratory. For the encounter-based  
230survey we considered a scenario with a similar separation of the fieldwork and species  
231identification: species records (audio or visual) are collected by a field biologist, and later  
232identified or verified by an expert in the office/laboratory. The parameters in our cost models are  
233an approximation of the variables involved in the present study and involve a learning effect in  
234the efficiency of the taxonomic expert (see Cost comparison in the Supplemental information for  
235details). The sampling and identification costs of VAES are dependent both on the number of  
236sampling sites, and the number of species since each species needs to be recorded. During the  
237eDNA survey samples are collected by a field biologist, analyzed in a lab and sequenced by an  
238external provider. The costs of eDNA sampling and identification depend on the number of sites,  
239but not on the number of species. We kept some cost factors constant: the costs for training the  
240frog taxonomic expert and the VAES observers, the costs for building up the eDNA  
241metabarcoding facilities (clean rooms and equipment to perform DNA manipulations, except  
242sequencing), and the databases necessary for the sequence assignment. We assume that  
243travel costs are the same for the two survey types, and that the time necessary to walk between

244frog observations and eDNA sampling points is the same. All model parameters and  
245calculations are accessible on FigShare (Bálint *et al.* 2017).

## 246 Results

247 The sequencing resulted in 12 742 273 read pairs (deposited in ENA as PRJEB22113),  
248 of which 9 479 299 were identified as complete 16S amplicons. De-replication of the reads (see  
249 Supplemental Information: Sequence processing for more information on the steps) resulted in  
250 631 003 unique sequences variants. Only 22 706 of these variants were represented by at least  
251 110 reads and retained for further processing. The sequence cleanup resulted in 14 442 high  
252 quality sequence variants, 13 497 coming from the present experiment. Of these, 4 805  
253 sequence variants were taxonomically assigned by the *ecotag* command with the 16S\_custom  
254 database, and 8 692 with the 16S\_EMBL database. The *ecotag* outputs are accessible on  
255 FigShare (<https://doi.org/10.6084/m9.figshare.5099842.v5>), and can be combined and simplified  
256 with the R script provided on GitHub (<https://github.com/MikiBalint/amphibian-eDNA>). The  
257 assigned sequence variants represented 8 011 631 sequences. After bioinformatic processing  
258 with OBITools 561 of these sequence variants were identified as ‘head’ sequences, i.e.  
259 sequences that have no variants more abundant than a predefined percentage of their own  
260 count, here 5% (see also Sequence processing in the Supplemental information) in at least one  
261 sample (6 965 866 reads). The original read numbers were re-assigned to these head sequence  
262 variants, and the read numbers were used in downstream analyses. Several of these 561 head  
263 sequence variants were found also in the negative controls. After removing the reads assigned  
264 to these, the final sample - sequence variant abundance matrix contained 5 815 014  
265 sequences. These belonged to several groups: frogs (2 158 534), fish (1 692 613), insects (304  
266 059), mammals (14 006), birds (967), and bacteria and other groups (1 063 156).

267 Read numbers assigned to frog species varied considerably among the spatial replicates  
268 of the eDNA samples (see *species\_abundance\_matrix.csv* – zipped - on FigShare:  
269 [https://figshare.com/articles/\\_/5099842](https://figshare.com/articles/_/5099842)). Numbers of frog species detected by both methods,

270eDNA and VAES, varied between 3 and 18 per pond (Table1). Several of the species present  
271at the ponds had no aquatic life phase during the time of survey (i.e. no larvae or adults in the  
272water), and this likely resulted in lack of detection. To better evaluate the performance of the  
273eDNA approach we thus assembled “reduced” VAES data sets containing only those species  
274that are known to have an aquatic life phase during the survey period. For example, we  
275excluded *Leptodactylus fuscus*, a species that was observed calling from the shore of the pond  
276during the survey, but for which no tadpoles were recorded at that time.

277

278 In summary, in the five ponds 31 frog species were detected in total with both VAES and  
279eDNA. Each of these methods detected 25 species, while the TS detected 4 species; 19  
280species were detected by both eDNA survey and VAES (Fig. 2A; Table 1). Six species were  
281detected only by eDNA, and six species were detected only by VAES. If we consider only  
282species with aquatic life phase during the sampling (“reduced” VAES data set; N=20 for all  
283ponds), of these eDNA detected 19 (Fig. 2B, Table 1, Supplemental Table S1).

284 We detected 11 species (of the twelve) from the equimolar DNA concentration positive  
285controls, and 6 in the non-equimolar DNA concentration controls (Supplemental Fig. S2). Read  
286numbers in the equimolar PCR controls were highly variable, but strongly correlated among the  
287controls ( $R > 0.7$  for each pair of positive controls, Supplemental Fig. S2A). The read numbers  
288in the non-equimolar positive control were strongly linked to the DNA template concentrations of  
289the PCRs (Pearson correlation coefficient  $R = 0.97$ , Supplemental Fig. S2B). Only  
290*Leptodactylus vastus* was recovered in the field positive control (water from an aquarium with *L.*  
291*vastus* tadpoles).

292 We found no difference in detection probability between the filter preservation methods  
293(CTAB buffer - A: detection probability  $p_1=0.278$  [0.242; 0.317]; dry - B:  $p_1=0.243$  [0.209; 0.281]),

294Supplemental Fig. S3). Interestingly, subsequent filtering of water filtered through glass fiber  
295filters with a 0.2  $\mu\text{m}$  nylon filter - C, appeared to show an increased detection probability  
296( $p_1=0.327$ , 95% C.I. = [0.285; 0.372]. The three approaches were equivalent with respect to  
297false positive probabilities (Supplemental Fig. S3).

298       Regarding the community structure assessment based on the eDNA data, replicate  
299samples of each pond grouped relatively tightly on the latent variable model ordination (Fig. 3A).  
300The pond identity was a statistically significant predictor of frog communities in the five ponds  
301(ANOVA,  $df = 6$ ,  $dev = 534.99$ ,  $p < 0.01$ ). This is reflected in the 95% confidence intervals of the  
302group centroids on the ordination which clearly separates all ponds except T1 and T3 (Fig. 3A).  
303The ordination of the eDNA pond centroids closely corresponds with the ordination of  
304observations from the five ponds with VAES (Procrustes permutation test,  $R = 0.8$ ,  $p = 0.03$ , Fig.  
3053B).

306       The cost model of VAES and eDNA showed that the starting costs (i.e. with few  
307sampling sites) for VAES are relatively low, but these costs rapidly increase until the taxonomic  
308expert becomes familiar with the regional frog fauna (Fig. 4). The VAES price is dependent on  
309the species richness: first, the VAES observer needs to record each species on the field, and  
310then the taxonomic expert needs to listen to each recording (Fig. 4). eDNA metabarcoding has a  
311relatively high entry price since consumables and sequencing are costly, regardless of the  
312number of sites. eDNA survey prices are then a linear function of the number of sampling sites,  
313and an increase in the site numbers simply adds to sampling and consumable costs, but does  
314not influence neither the time spent in the laboratory, nor the sequencing costs (Fig. 4).

315

## 316 Discussion

317 The one-time eDNA survey detected 25 species in the studied ponds and confirmed the  
318 presence of (i) almost all species that were in contact with water during the survey time, (ii) all  
319 species that had tadpoles in the ponds, (iii) more than half of all 45 species ever recorded from  
320 the area, and (iv) about 65% of the 35 species ever recorded in the five surveyed ponds. The  
321 eDNA dataset recorded clear differences among the frog communities in the surveyed ponds, a  
322 result also in accordance with the VAES data. The comparison of VAES and eDNA cost models  
323 show that eDNA biodiversity surveys may be a cost-efficient alternative to VAES in species-rich  
324 areas, but not necessarily in areas with low species numbers. Specific recommendations and  
325 technical remarks are presented in the Supplemental information.

326 eDNA approaches for routine use in tropical regions will benefit from the implementation  
327 of straightforward and robust sampling techniques. The comparison of the filtration-preservation  
328 approaches shows that filters can be dried in the field before being sent to a lab. Currently only  
329 few comparative studies exist regarding the preservation of eDNA filtrates on filters (e.g., Hinlo  
330 *et al.*, 2017; Spens *et al.*, 2017). Hinlo *et al.* (2017) showed that the simple refrigeration of filters  
331 may be preferred to frozen storage. Here we show that filters can be dried in the field: this  
332 simplifies transportation and storage since no special precautions are needed, unlike for liquid  
333 handling. Interestingly, small pore-size nylon filters seemed to recover a high proportion of  
334 target DNA that had previously passed through a 2  $\mu\text{m}$  mesh sized glass fibre filter. While this  
335 result may be caused by the different extraction methods used, we consider it likely that a large  
336 proportion of DNA occurred in extracellular form. This result suggests that alternative filtering  
337 methods based on fine-scale mesh sized filtration with limited filtering volumes may further  
338 increase success rates in eDNA studies on amphibian communities. By limited volumes we do  
339 not suggest sampling only a few hundred ml of water, but rather to sample enough from a



340waterbody to ensure representativeness, and then filter from this well-mixed sample until the  
341filter clogs.

342 During the one-time surveys, six species were only detected with eDNA, and not with  
343VAES (Fig. 2A). Four of these species (*Dermatonotus muelleri*, *Leptodactylus elenae*,  
344*Osteocephalus taurinus*, *Rhinella schneideri*) are quite common in the area. The detection of  
345these four species by eDNA but not by VAES may result from the low abundance of adults or  
346tadpoles in the ponds, or a lack in acoustic activity. In some cases eDNA detections are even  
347likely based on single tadpoles or single adults only. For example, one adult *L. syphax* was  
348heard calling from a crevice of a rocky outcrop, its usual habitat (de Sá *et al.* 2014),  
349approximately 30 m away from T2, but detection by eDNA most probably was due to the  
350presence of tadpoles in pond T2. All other species that had tadpoles in the ponds were also  
351detected by eDNA (Table 1). Furthermore, our results suggest that detection of rare or solitary  
352species by eDNA is possible, since the presence of *L. vastus* in the eDNA most possibly can be  
353traced back to single, territorial adult males that were present during VAES of T4 and T5. These  
354examples show the great potential of eDNA for detection of elusive life stages like tadpoles and  
355less abundant species. The remaining two species detected only with eDNA are not known to  
356occur in the area, thus they are candidates for false assignments. The low read numbers  
357assigned to these species also supports this (Supplemental Table S1). Both of these were  
358assigned with sequence data from EMBL (*L. latinasus*: KM091595, *L. laevis*: AY843696).  
359*Lysapsus laevis* would be the first record of this genus in the study area, but the identification of  
360*Lysapsus* populations only using short 16S eDNA sequences is questionable, especially when  
361considering the unclear taxonomy of the group in Bolivia. Nevertheless, based on their  
362distribution and ecology all of the four known species of *Lysapsus* (*L. boliviana*, *L. caraya*, *L.*  
363*laevis*, *L. limellum*) may occur at the site (De la Riva *et al.* 2000; Lavilla *et al.* 2004; Reichle  
3642004a; b; Angulo 2008; Jansen *et al.* 2011; Frost 2016). They may have remained undetected

365 thus far simply because of their small size and rather inconspicuous advertisement call.

366 *Leptodactylus latinasus* is another species possibly occurring in the area that had so far never  
367 been recorded (de Sá *et al.* 2014) and we cannot exclude the possibility that the corresponding  
368 sequence variant is actually an erroneous variant of one of the six local *Leptodactylus* species.

369 Species' ecology might explain why some species were detected only with VAES, but  
370 not by eDNA (Fig. 2A, Supplemental Table S1). None of these species are strictly bound to  
371 ponds in the life stages occurring during our sampling: *Dendropsophus arndti* and *D. salli*,  
372 usually call from plants on the pond shores (Schulze *et al.* 2009) and have only sporadic contact  
373 with water. *Leptodactylus fuscus* and *Pseudopaludicola* sp. also do not enter the water but  
374 usually call from nearby muddy grounds or grasslands. We did not detect tadpoles of these  
375 species in the ponds: the tadpoles of these species develop during the rainy season which  
376 triggers reproduction, but our sampling slightly preceded the rainy season. Some of the other  
377 undetected species have terrestrial or quasi-terrestrial life histories: *L. fuscus* deposits eggs  
378 within foam nests in underground burrows at some distance from ponds and these are washed  
379 into nearby water bodies by floods that follow heavy rains (Heyer 1978; Lucas *et al.* 2008).  
380 *Boana geographica* was likely missed as a result of PCR bias: we could never recover it from  
381 positive controls when DNA from other species was also present (Supplemental Fig. S2),  
382 although single-template PCR reactions worked. *H. geographicus* was also not detected by  
383 VAES, so it is possible that the species was not present during the survey. If we consider the  
384 specific life histories, the one-time eDNA survey only missed a single species  
385 (*Sphaenorhynchus lacteus*) in the area which was found calling from the water during the VAES  
386 (Fig. 2B, Supplemental Table S1). Regarding the whole local species pool (45 species in 10  
387 years), some of the species (10) may not be detectable by eDNA since they reproduce outside  
388 of water (e.g. *Leptodactylus mystacinus*), or are forest dwellers (e.g. *Leptodactylus* cf. *didymus*,  
389 Fig. 2D, Table S2). Overall, the results suggests that eDNA performed similarly well in detecting

390species as VAES, but it was not successful to identify all species occurring at the specific  
391ponds. Differences among individual ponds may result from the differential observational biases  
392of eDNA and VAES approaches, none of which is providing a “true” list of species (hence the  
393long-standing need to model species occupancy). eDNA methods seem to be a powerful tool for  
394the detection of elusive life stages and less abundant species in tropical communities: with a  
395single sampling eDNA detected more than half of the 45 species known to be present in the  
396area, and about 65% of the detectable species from the area (23 out of 35).

397       The sampling was done at the beginning of the rainy season when only few species  
398reproduced in the ponds. Repeating the sampling during the rainy season could have increased  
399species detections by eDNA. The results show the importance of life history in the  
400metabarcoding-based survey of tropical frogs and emphasize that sampling at multiple time  
401points may be essential for more complete species pools also with eDNA (see  
402Recommendations and technical remarks in the Supplemental information). Comprehensive  
403and taxonomically sound sequence databases are essential for eDNA metabarcoding studies:  
404we had a database that contained all 45 species that were ever recorded in the area. This  
405database was essential for both initial primer development, and taxonomic assignments: indeed,  
406both eDNA-recorded taxa that were not present on the complete local species list of the present  
407study (Fig. 2, Supplemental Table S2) were identified in the EMBL-based assignment that  
408followed the assignment with the custom local 16S database. The importance of sequence  
409assignment databases is long recognized, with considerable efforts underway to establish them  
410(Ratnasingham & Hebert 2007; Coissac *et al.* 2016). There is an urgent need of further DNA  
411sampling to create regional reference data banks, but only a few studies aim at completing DNA  
412sampling of local anurofaunas in South America (e.g. Jansen *et al.* 2011; Guarnizo *et al.* 2015;  
413Moraes *et al.* 2017). However, a preferably complete geographical and taxonomic coverage is  
414necessary for continent-wide eDNA-based frog inventories. Increased DNA sampling will also

415increase knowledge about actual distributions and taxonomy of Neotropical frogs (including  
416cryptic lineages). This will improve IUCN evaluations, which currently clearly lack distributional  
417information (Supplemental Table S1).

418       There was considerable variation in the species recorded with the spatial replicates of  
419the eDNA samples, and this underlines that eDNA sampling should be replicated for a good  
420representation of community composition. These samples may be pooled before DNA extraction  
421to optimize costs if site-level variation is not of interest. Interestingly, community structures  
422across ponds inferred from both eDNA and VAES datasets were highly similar (Fig. 3). The  
423eDNA data did not distinguish the communities from ponds T1 and T3, and these communities  
424also grouped closely in the VAES results. Although the comparison of frog community structures  
425among the assessed ponds may be confounded by the different sample sizes (with the eDNA  
426ordination based on many spatial replicates and the VAES ordination on a single observation  
427event per pond), and the eDNA ordinations are based on read-abundances in contrast to the  
428VAES presence-absence ordinations, the correspondence of the results is still striking. Similar  
429results were found in insect (Ji *et al.* 2013; Elbrecht *et al.* 2017) and plant communities  
430(Niemeyer *et al.* 2017) where eDNA-based and morphology-based identifications result in  
431similar conclusions about community structure, despite markedly different species lists. Our  
432results provide further evidence that eDNA-based biodiversity surveys are highly sensitive to  
433differences among ecological communities. These inferences are comparable to those derived  
434with encounter-based observations and are informative about processes that underlay  
435community assembly.

436       Although central to deciding on a method for biodiversity surveys, cost comparisons are  
437not straightforward since they need to be based on expert knowledge both in VAES and eDNA.  
438Cost comparisons were performed for single species eDNA detection (Huver *et al.* 2015; Davy  
439*et al.* 2015; Smart *et al.* 2016), but we are not aware of frameworks suitable for eDNA

440metabarcoding. Here the VAES cost estimation is informed by over a decade of field and  
441integrative taxonomic work with tropical frogs (Jansen *et al.* 2007, 2016; Schulze *et al.* 2009;  
442Brusquetti *et al.* 2014), while the eDNA part is only informed by a few years of eDNA  
443biodiversity surveys (Bálint *et al.* 2016; Vörös *et al.* 2017). Such comparisons are urgently  
444needed due to stakeholder demands in eDNA (e.g. governmental agencies, conservation  
445NGOs, fisheries, etc.).

446       The two species richness scenarios we defined for cost comparisons (Fig. 4) shows that  
447VAES costs become high in regions with high frog richness since they are a function of both the  
448number of sites and the number of species. Biodiversity surveys with eDNA are not necessarily  
449cheaper in low-richness regions since entry costs for the eDNA work are high: lab consumables  
450and sequencing are costly. However, eDNA survey costs are not dependent on the local  
451biodiversity since metabarcoding can consider thousands of species simultaneously in a sample  
452(Taberlet *et al.* 2012b). Consequently, eDNA costs are function of sample numbers, which  
453influence the collection time spent on the field and consumables. eDNA metabarcoding  
454operations are easily scaled up in a sense that hundreds of samples can be simultaneously  
455processed (Ficetola *et al.* 2015).

456       Several aspects of our cost models are contentious. One issue is whether the relatively  
457untrained VAES observers, or taxonomic experts perform the fieldwork, since taxonomic experts  
458may identify many of the targeted frog species immediately on the field. Currently, most surveys  
459of high-diversity areas are directly done by experts interested in the local fauna, but we argue  
460that this will not work for continental - global biodiversity surveys simply because there are not  
461enough taxonomic experts (Buyck 1999; Haas & Häuser 2003). We also did not consider a  
462scenario when VAES surveys are performed with automated recording devices (ARDs), and  
463sounds are automatically identified by algorithms (see Recommendations and technical remarks  
464in the Supplemental Information). The sound complexity in tropical environments currently

465prohibits the use of automated sound identifications (Campos-Cerqueira & Aide 2016). It is also  
466difficult to compare fundamental infrastructure and training costs (i.e. the establishment of an  
467eDNA laboratory versus the training of taxonomic experts). Discussions about cost models are  
468timely since they will play major roles in devising much needed continental and global  
469biodiversity surveys (Tittensor *et al.* 2014).

## 470 Conclusions

471 eDNA seems to be suitable to standardized biodiversity surveys of frogs even in  
472species-rich areas, but it may be overly costly for smaller studies in low-richness regions.  
473Differences between eDNA and traditional surveys seem to result largely from different  
474observational biases. Consideration of life histories promises to improve comprehensiveness of  
475both types of surveys and thus also their correspondence. The eDNA data is certainly suitable  
476to characterize not only community composition, but also the factors that shape communities:  
477this gives an unprecedented opportunity to incorporate eDNA as a standard toolkit for  
478community ecology and macroecology. Assessing community structure with eDNA-based  
479community data foresees global biodiversity surveys and monitoring that will support both  
480biodiversity research, and informed decisions on sustainable use of biological diversity.

481

## 482 Acknowledgements

483 The authors thank Jenny Wertheimer for technical assistance during eDNA extraction,  
484 José Ribeiro for a helpful discussion on passive acoustic monitoring, and Simon Vitecek for  
485 helpful suggestions on the manuscript. MJ, AS and JLA thank the owners of Hacienda San  
486 Sebastián (family Werding) for their invitation to conduct herpetological surveys on their  
487 properties and for logistic support. TC was supported by the USGS Amphibian Research and  
488 Monitoring Initiative. MJ was supported by the Erika and Walter Datz-Stiftung, Bad Homburg v.  
489 d. H., equipment was sponsored by Globetrotter, Frankfurt. This research presents an outcome  
490 of the Centre for Translational Biodiversity Genomics (LOEWE-TBG) and was supported by the  
491 research funding programme "LOEWE – Landes-Offensive zur Entwicklung Wissenschaftlich-  
492 ökonomischer Exzellenz" of Hesse's Ministry of Higher Education, Research, and the Arts.

493



## 494       References

- 495Angulo A (2008) *Lysapsus boliviana*. *The IUCN Red List of Threatened Species*.
- 496Bailey LL, MacKenzie DI, Nichols JD (2014) Advances and applications of occupancy models.  
497       *Methods in ecology and evolution / British Ecological Society*, **5**, 1269–1279.
- 498Bálint M, Bahram M, Eren AM *et al.* (2016) Millions of reads, thousands of taxa: microbial  
499       community structure and associations analyzed via marker genes. *FEMS microbiology*  
500       *reviews*, **40**, 686–700.
- 501Bálint M, Domisch S, Engelhardt CHM *et al.* (2011) Cryptic biodiversity loss linked to global  
502       climate change. *Nature climate change*, **1**, 313–318.
- 503Bálint M, Nowak C, Márton O *et al.* (2017) Input files for the comparison of visual-audio  
504       encounter surveys and eDNA metabarcoding of species-rich tropical frog communities.  
505       <https://doi.org/10.6084/m9.figshare.5099842>
- 506Barnosky AD, Matzke N, Tomiya S *et al.* (2011) Has the Earth’s sixth mass extinction already  
507       arrived? *Nature*, **471**, 51–57.
- 508Bishop PJ, Angulo A, Lewis JP (2012) The amphibian extinction crisis-what will it take to put the  
509       action into the amphibian conservation action plan? *SAPI EN. S. Surveys*.
- 510Bista I, Carvalho GR, Walsh K *et al.* (2017) Annual time-series analysis of aqueous eDNA  
511       reveals ecologically relevant dynamics of lake ecosystem biodiversity. *Nature*  
512       *communications*, **8**, 14087.
- 513Bohmann K, Evans A, Gilbert M *et al.* (2014) Environmental DNA for wildlife biology and  
514       biodiversity monitoring. *Trends in ecology & evolution*, **29**, 358–367.
- 515Boyer F, Mercier C, Bonin A *et al.* (2016) obitools: a unix-inspired software package for DNA  
516       metabarcoding. *Molecular ecology resources*, **16**, 176–182.
- 517Brusquetti F, Jansen M, Barrio-Amorós *et al.* (2014) Taxonomic review of *Scinax*

- 518 *fuscmarginatus* (Lutz, 1925) and related species (Anura; Hylidae). *Zoological journal of*  
519 *the Linnean Society*, **171**, 783–821.
- 520 Bush A, Sollmann R, Wilting A *et al.* (2017) Connecting Earth observation to high-throughput  
521 biodiversity data. *Nature Ecology & Evolution*, **1**, 176.
- 522 Butchart SHM, Walpole M, Collen B *et al.* (2010) Global biodiversity: indicators of recent  
523 declines. *Science*, **328**, 1164–1168.
- 524 Buyck B (1999) Taxonomists are an endangered species in Europe. *Nature*, **401**, 321.
- 525 Caminer MA, Milá B, Jansen M *et al.* (2017) Systematics of the *Dendropsophus leucophyllatus*  
526 species complex (Anura: Hylidae): Cryptic diversity and the description of two new species.  
527 *PloS one*, **12**, e0171785.
- 528 Campos-Cerqueira M, Aide TM (2016) Improving distribution data of threatened species by  
529 combining acoustic monitoring and occupancy modelling. *Methods in ecology and evolution*  
530 */ British Ecological Society*, **7**, 1340–1348.
- 531 Castro AAJF, A A J, Martins FR, Tamashiro JY, Shepherd GJ (1999) How rich is the flora of  
532 Brazilian Cerrados? *Annals of the Missouri Botanical Garden. Missouri Botanical Garden*,  
533 **86**, 192.
- 534 Clarke DA, York PH, Rasheed MA, Northfield TD (2017) Does biodiversity–ecosystem function  
535 literature neglect tropical ecosystems? *Trends in ecology & evolution*, **32**, 320–323.
- 536 Coissac E, Hollingsworth PM, Lavergne S, Taberlet P (2016) From barcodes to genomes:  
537 extending the concept of DNA barcoding. *Molecular ecology*, **25**, 1423–1428.
- 538 Costello MJ, May RM, Stork NE (2013) Can we name Earth’s species before they go extinct?  
539 *Science*, **339**, 413–416.
- 540 Cristescu ME (2014) From barcoding single individuals to metabarcoding biological  
541 communities: towards an integrative approach to the study of global biodiversity. *Trends in*  
542 *ecology & evolution*, **29**, 566–571.
- 543 Davy CM, Kidd AG, Wilson CC (2015) Development and validation of environmental DNA

- 544 (eDNA) markers for detection of freshwater turtles. *PloS one*, **10**, e0130965.
- 545De la Riva I, Köhler J, Lötters S, Reichle S (2000) Ten years of research on Bolivian  
546 amphibians: updated checklist, distribution, taxonomic problems, literature and  
547 iconography. *Revista espanola de herpetologia*, **14**, 19–164.
- 548de Sá RO, Grant T, Camargo A *et al.* (2014) Systematics of the neotropical genus  
549 *Leptodactylus* Fitzinger, 1826 (Anura: Leptodactylidae): phylogeny, the relevance of non-  
550 molecular evidence, and species accounts. *South american journal of herpetology /*  
551 *Sociedade Brasileira de Herpetologia*, **9**, S1–S100.
- 552Duellman W, Pyles R (1983) Acoustic resource partitioning in anuran communities. *Copeia*, **1983**,  
553 639–649.
- 554Elbrecht V, Vamos EE, Meissner K, Aroviita J, Leese F (2017) Assessing strengths and  
555 weaknesses of DNA metabarcoding-based macroinvertebrate identification for routine  
556 stream monitoring. *Methods in ecology and evolution / British Ecological Society*, **8**, 1265–  
557 1275.
- 558Ferrão M, Colatreli O, de Fraga R *et al.* (2016) High species richness of *Scinax* treefrogs  
559 (Hylidae) in a threatened Amazonian landscape revealed by an integrative approach. *PloS*  
560 *one*, **11**, e0165679.
- 561Ficetola, GF, Miaud C, Pompanon F, Taberlet P (2008) Species detection using environmental  
562 DNA from water samples. *Biology letters*, **4**, 423–425.
- 563Ficetola, GF, Miaud C, Pompanon F, Taberlet P (2008) Species detection using environmental  
564 DNA from water samples. *Biology letters*, **4**, 423–425.
- 565Fiske I, Chandler R, Others (2011) unmarked: An R package for fitting hierarchical models of  
566 wildlife occurrence and abundance. *Journal of statistical software*, **43**, 1–23.
- 567Fouquet A, Gilles A, Vences M *et al.* (2007) Underestimation of species richness in neotropical  
568 frogs revealed by mtDNA analyses. *PloS one*, **2**, e1109.
- 569Frost DR (2016) Amphibian Species of the World: an Online Reference. Version 6.0.

- 570 Gehara M, Canedo C, Haddad CFB, Vences M (2013) From widespread to microendemic:  
571 molecular and acoustic analyses show that *Ischnocnema guentheri* (Amphibia:  
572 Brachycephalidae) is endemic to Rio de Janeiro, Brazil. *Conservation genetics*, **14**, 973–  
573 982.
- 574 Gehara M, Crawford AJ, Orrico VGD *et al.* (2014) High levels of diversity uncovered in a  
575 widespread nominal taxon: continental phylogeography of the Neotropical tree frog  
576 *Dendropsophus minutus*. *PloS one*, **9**, e103958.
- 577 Goldberg, CS, Pilliod DS, Arkle RS, Waits LP (2011) Molecular detection of vertebrates in  
578 stream water: A demonstration using Rocky Mountain Tailed Frogs and Idaho Giant  
579 Salamanders. *Plos One*, **6**, e22746.
- 580 Guarnizo CE, Paz A, Muñoz-Ortiz A, *et al.* (2015) DNA barcoding survey of anurans across the  
581 eastern Cordillera of Colombia and the impact of the Andes on cryptic diversity. *PLoS one*,  
582 **10**, e0127312.
- 583 Haas F, Häuser CL (2003) Taxonomists: an endangered species? In: *Success stories in*  
584 *implementation of the programmes of work on dry and sub-humid lands and the global*  
585 *taxonomy initiative*, p. 87. Montreal: Secretariat of the Convention on Biological Diversity
- 586 Haddad, CFB, Prado CPA (2005); Reproductive modes in frogs and their unexpected diversity  
587 in the Atlantic Forest of Brazil. *BioScience*, **55**, 207–217.
- 588 Henry P-Y, Lengyel S, Nowicki P *et al.* (2008) Integrating ongoing biodiversity monitoring:  
589 potential benefits and methods. *Biodiversity and conservation*, **17**, 3357–3382.
- 590 Heyer WR (1978) Systematics of the fuscus group of the frog genus *Leptodactylus* (Amphibia,  
591 Leptodactylidae). Natural History Museum of Los Angeles County.
- 592 Hinlo R, Gleeson D, Lintermans M, Furlan E (2017) Methods to maximise recovery of  
593 environmental DNA from water samples. *PloS one*, **12**, e0179251.
- 594 Hui FKC, Taskinen S, Pledger S, Foster SD, Warton DI (2015) Model-based approaches to  
595 unconstrained ordination. *Methods in ecology and evolution / British Ecological Society*, **6**,

- 596 399–411.
- 597Huver JR, Koprivnikar J, Johnson PTJ, Whyard S (2015) Development and application of an  
598 eDNA method to detect and quantify a pathogenic parasite in aquatic ecosystems.  
599 *Ecological applications: a publication of the Ecological Society of America*, **25**, 991–1002.
- 600Jansen M (2009) Measuring temporal variation in calling intensity of a frog chorus with a data  
601 logging sound level meter: results from a pilot study in Bolivia. *Herpetology notes*, **2**, 143–  
602 149.
- 603Jansen M, Álvarez LG, Köhler G (2007) New species of *Hydrolaetare* (Anura, Leptodactylidae)  
604 from Bolivia with some notes on its natural history. *Journal of Herpetology*, **41**, 724–732.
- 605Jansen M, Bloch R, Schulze A, Pfenninger M (2011) Integrative inventory of Bolivia's lowland  
606 anurans reveals hidden diversity. *Zoologica scripta*, **40**, 567–583.
- 607Jansen M, Plath M, Brusquetti F, Ryan MJ (2016) Asymmetric frequency shift in advertisement  
608 calls of sympatric frogs. *Amphibia-reptilia: publication of the Societas Europaea*  
609 *Herpetologica*, **37**, 137–152.
- 610Jerde CL, Mahon AR, Chadderton WL, Lodge DM (2011) "Sight-unseen" detection of rare  
611 aquatic species using environmental DNA. *Conservation letters*, **4**, 150–157.
- 612Ji Y, Ashton L, Pedley SM *et al.* (2013) Reliable, verifiable and efficient monitoring of  
613 biodiversity via metabarcoding. *Ecology letters*, **16**, 1245–1257.
- 614Jungfer K-H, Reichle S, Piskurek O (2010) Description of a new cryptic southwestern  
615 Amazonian species of leaf-gluing treefrog, genus *Dendropsophus* (Amphibia: Anura:  
616 Hylidae). *Salamandra*, **46**, 204–213.
- 617Kozarewa I, Turner DJ (2011) 96-plex molecular barcoding for the Illumina Genome Analyzer.  
618 In: *High-Throughput Next Generation Sequencing* (eds Kwon YM, Ricke CR), pp. 279–298.  
619 Humana Press, Totowa, NJ.
- 620Lavilla E, Reichle S, Lajmanovich R, Faivovich, Julian (2004) *Lysapsus limellum*. *The IUCN*  
621 *Red List of Threatened Species*.

- 622Lees AC, Pimm SL (2015) Species, extinct before we know them? *Current biology: CB*, **25**,  
623 R177–80.
- 624Lopes CM, Sasso T, Valentini A *et al.* (2016) eDNA metabarcoding: a promising method for  
625 anuran surveys in highly diverse tropical forests. *Molecular ecology resources*, **17**, 904–  
626 914.
- 627Lucas EM, Brasileiro CA, Oyamaguchi HM, Martins M (2008) The reproductive ecology of  
628 *Leptodactylus fuscus* (Anura, Leptodactylidae): new data from natural temporary ponds in  
629 the Brazilian Cerrado and a review throughout its distribution. *Journal of natural history*, **42**,  
630 2305–2320.
- 631MacKenzie DI, Nichols JD, Lachman GB *et al.* (2002) Estimating site occupancy rates when  
632 detection probabilities are less than one. *Ecology*, **83**, 2248–2255.
- 633Miles L, Newton AC, DeFries RS *et al.* (2006) A global overview of the conservation status of  
634 tropical dry forests. *Journal of biogeography*, **33**, 491–505.
- 635Miller DA, Nichols JD, McClintock BT *et al.* (2011) Improving occupancy estimation when two  
636 types of observational error occur: non-detection and species misidentification. *Ecology*, **92**,  
637 1422–1428.
- 638Miya M, Sato Y, Fukunaga T *et al.* (2015) MiFish, a set of universal PCR primers for  
639 metabarcoding environmental DNA from fishes: detection of more than 230 subtropical  
640 marine species. *Royal Society open science*, **2**, 150088.
- 641Moraes LJCL, Almeida AP, Fraga R *et al.* (2017) Integrative overview of the herpetofauna from  
642 Serra da Mocidade, a granitic mountain range in Northern Brazil. *ZooKeys*, **715**, 103-159.
- 643Møller AP (2010) When climate change affects where birds sing. *Behavioral ecology: official*  
644 *journal of the International Society for Behavioral Ecology*, **22**, 212–217.
- 645Niemeyer B, Epp LS, Stoof-Leichsenring KR, Pestryakova LA, Herzsuh U (2017) A  
646 comparison of sedimentary DNA and pollen from lake sediments in recording vegetation  
647 composition at the Siberian treeline. *Molecular ecology resources*, **17**, e46–e62.

- 648Ortega-Andrade HM, Rojas-Soto OR, Valencia JH *et al.* (2015) Insights from integrative  
649 systematics reveal cryptic diversity in *Pristimantis* frogs (Anura: Craugastoridae) from the  
650 Upper Amazon Basin. *PloS one*, **10**, e0143392.
- 651Pauls SU, Nowak C, Bálint M, Pfenninger M (2013) The impact of global climate change on  
652 genetic diversity within populations and species. *Molecular ecology*, **22**, 925–946.
- 653Pedersen MW, Overballe-Petersen S, Ermini L *et al.* (2015) Ancient and modern environmental  
654 DNA. *Philosophical transactions of the Royal Society of London. Series B, Biological*  
655 *sciences*, **370**, 20130383.
- 656Peres-Neto PR, Jackson DA (2001) How well do multivariate data sets match? The advantages  
657 of a pProcrustean superimposition approach over the Mantel test. *Oecologia*, **129**, 169–  
658 178.
- 659Petitot M, Manceau N, Geniez P, Besnard A (2014) Optimizing occupancy surveys by  
660 maximizing detection probability: application to amphibian monitoring in the Mediterranean  
661 region. *Ecology and evolution*, **4**, 3538–3549.
- 662Pfenninger M, Schwenk K (2007) Cryptic animal species are homogeneously distributed among  
663 taxa and biogeographical regions. *BMC evolutionary biology*, **7**, 121.
- 664Pimm SL, Jenkins CN, Abell R *et al.* (2014) The biodiversity of species and their rates of  
665 extinction, distribution, and protection. *Science*, **344**, 1246752.
- 666Power MJ, Whitney BS, Mayle FE *et al.* (2016) Fire, climate and vegetation linkages in the  
667 Bolivian Chiquitano seasonally dry tropical forest. *Philosophical transactions of the Royal*  
668 *Society of London. Series B, Biological sciences*, **371**, 20150165.
- 669Ratnasingham S, Hebert PDN (2007) BARCODING: bold: The barcode of life data system  
670 (<http://www.barcodinglife.org>). *Molecular ecology notes*, **7**, 355–364.
- 671R Core Team (2017) *R: A Language and Environment for Statistical Computing*.
- 672Rees HC, Maddison BC, Middleditch DJ *et al.* (2014) The detection of aquatic animal species  
673 using environmental DNA - a review of eDNA as a survey tool in ecology. *Journal of applied*

- 674 ecology, **51**, 1450–1459.
- 675 Reichle S (2004a) *Lysapsus laevis*. *The IUCN Red List of Threatened Species*.
- 676 Reichle S (2004b) *Lysapsus caraya*. *The IUCN Red List of Threatened Species*.
- 677 Schmeller DS, Böhm M, Arvanitidis C *et al.* (2017) Building capacity in biodiversity monitoring at  
678 the global scale. *Biodiversity and conservation*, **26**, 2765–2790.
- 679 Schulze A, Jansen M, Köhler G (2009) Diversity and ecology of anuran communities in San  
680 Sebastián (Chiquitano region, Bolivia). *Salamandra*, **45**, 75–90.
- 681 Schulze A, Jansen M, Köhler G (2015) Tadpole diversity of Bolivia’s lowland anuran  
682 communities: molecular identification, morphological characterisation, and ecological  
683 assignment. *Zootaxa*, **4016**, 1–111.
- 684 Shaw JLA, Clarke LJ, Wedderburn SD, *et al.* (2016) Comparison of environmental DNA  
685 metabarcoding and conventional fish survey methods in a river system. *Biological  
686 Conservation*, **197**, 131–138.
- 687 Smart AS, Weeks AR, van Rooyen AR *et al.* (2016) Assessing the cost-efficiency of  
688 environmental DNA sampling. *Methods in Ecology and Evolution*, **7**, 1291–1298.
- 689 Spens J, Evans AR, Halfmaerten D, *et al.* (2017) Comparison of capture and storage methods  
690 for aqueous microbial eDNA using an optimized extraction protocol: advantage of enclosed  
691 filter. *Methods in Ecology and Evolution*, **8**, 635–645.
- 692 Strand DA, Jussila J, Johnsen SI *et al.* (2014) Detection of crayfish plague spores in large  
693 freshwater systems. *The Journal of applied ecology*, **51**, 544–553.
- 694 Stroud JT, Feeley KJ (2017) Neglect of the Tropics Is Widespread in Ecology and Evolution: A  
695 Comment on Clarke *et al.* *Trends in ecology & evolution*, **32**, 626–628.
- 696 Stuart SN, Chanson JS, Cox NA *et al.* (2004) Status and trends of amphibian declines and  
697 extinctions worldwide. *Science*, **306**, 1783–1786.
- 698 Taberlet P, Coissac E, Hajibabaei M, Rieseberg LH (2012a) Environmental DNA. *Molecular  
699 ecology*, **21**, 1789–1793.



700 Taberlet P, Coissac E, Pompanon F, Brochmann C, Willerslev E (2012b) Towards next-  
701 generation biodiversity assessment using DNA metabarcoding. *Molecular ecology*, **21**,  
702 2045–2050.

703 Thomsen, PF, Kielgast J, Iversen LL *et al.* (2012a) Monitoring endangered freshwater  
704 biodiversity using environmental DNA. *Molecular Ecology*, **21**, 2565–2573.

705 Thomsen PF, Kielgast J, Iversen LL *et al.* (2012b) Detection of a diverse marine fish fauna  
706 using environmental DNA from seawater samples. *PloS one*, **7**, e41732. Thomsen PF,  
707 Willerslev E (2015) Environmental DNA – An emerging tool in conservation for monitoring  
708 past and present biodiversity. *Biological conservation*, **183**, 4–18.

709 Tittensor DP, Walpole M, Hill SLL *et al.* (2014) A mid-term analysis of progress toward  
710 international biodiversity targets. *Science*, **346**, 241–244.

711 UNEP (2016) The strategic plan for biodiversity 2011-2020, the Aichi biodiversity targets and  
712 NBSAPs. In: *Sourcebook of Opportunities for Enhancing Cooperation among the*  
713 *Biodiversity-Related Conventions at National and Regional Levels*, pp. 108–135.

714 Valentini A, Taberlet P, Miaud C *et al.* (2016) Next-generation monitoring of aquatic biodiversity  
715 using environmental DNA metabarcoding. *Molecular ecology*, **25**, 929–942.

716 Vörös J, Márton O, Schmidt BR, Gál JT, Jelić D (2017) Surveying Europe’s only cave-dwelling  
717 chordate species (*Proteus anguinus*) using environmental DNA. *PloS one*, **12**, e0170945.

718 Wang Y, Naumann U, Wright ST, Warton DI (2012) mvabund- an Rpackage for model-based  
719 analysis of multivariate abundance data. *Methods in ecology and evolution / British*  
720 *Ecological Society*, **3**, 471–474.

721 Wells KD (2010) *The ecology and behavior of amphibians*. University of Chicago Press.

722 Whittaker K, Koo MS, Wake DB, Vredenburg VT (2013) Global declines of amphibians. In:  
723 *Encyclopedia of Biodiversity (Second Edition)* (ed Levin SA), pp. 691–699. Academic  
724 Press, Waltham.

725 Wilson DM, Bart J (1985) Reliability of singing bird surveys: effects of song phenology during

726 the breeding season. *The Condor*, **87**, 69–73.

727 Wittwer C, Stoll S, Cocchiararo B, Strand D, Vrålstad T, Nowak C, Thines M (2017) eDNA-

728 based crayfish plague monitoring is superior to conventional trap-based assessments in

729 year-round detection probability. *Hydrobiologia* (pending minor revision).

730 Yamamoto S, Masuda R, Sato Y *et al.* (2017) Environmental DNA metabarcoding reveals local

731 fish communities in a species-rich coastal sea. *Scientific reports*, **7**, 40368.

732 Zimmerman BL (1994) Audio strip transects. In: *Measuring and monitoring biological*

733 *biodiversity. Standard methods for amphibians* (eds Heyer WR, Donnelly MA, McDiarmid

734 RW, Hayek LC, Foster MS), pp. 99–108. Smithsonian Institution Press, Washington DC.

735

736

737

738

739 **Data accessibility**

740 DNA sequences: EMBL accession PRJEB22113

741 Cost model parameters and calculations: FigShare,

742 <https://doi.org/10.6084/m9.figshare.5099842.v5>

743 Input data for statistical analyses: FigShare,

744 <https://doi.org/10.6084/m9.figshare.5099842.v5>.

745 R-script for bioinformatic filtering and statistical analyses:

746 <https://doi.org/10.5281/zenodo.1294092>

747

748 **Author contributions**

749 M.B., M.J., C.N., C.W. designed research; J.L.A., M.B., M.J., O.M., A.S., C.W., B.C.

750performed research; B.C., T.C., C.N., S.U.P. contributed reagents or analytic tools; M.B., M.J.

751analysed data; M.B., T.C., M.J., O.M., C.N., S.U.P., wrote the manuscript.

752

## 753 Tables

### 754 Table 1.

755 Numbers of detected species by method per pond (VAES = Visual-audio encounter  
756 surveys. Reduced VAES = only considering species that were in contact with water during  
757 survey).

| <b>Pond</b> | <b>eDNA</b> | <b>VAES</b> | <b>Reduced VAES</b> | <b>Tadpole survey</b> |
|-------------|-------------|-------------|---------------------|-----------------------|
| T1          | 10          | 8           | 6                   | 4                     |
| T2          | 7           | 4           | 4                   | 3                     |
| T3          | 3           | 7           | 3                   | 0                     |
| T4          | 9           | 15          | 13                  | 1                     |
| T5          | 13          | 18          | 14                  | 1                     |

758

## 759 Figures

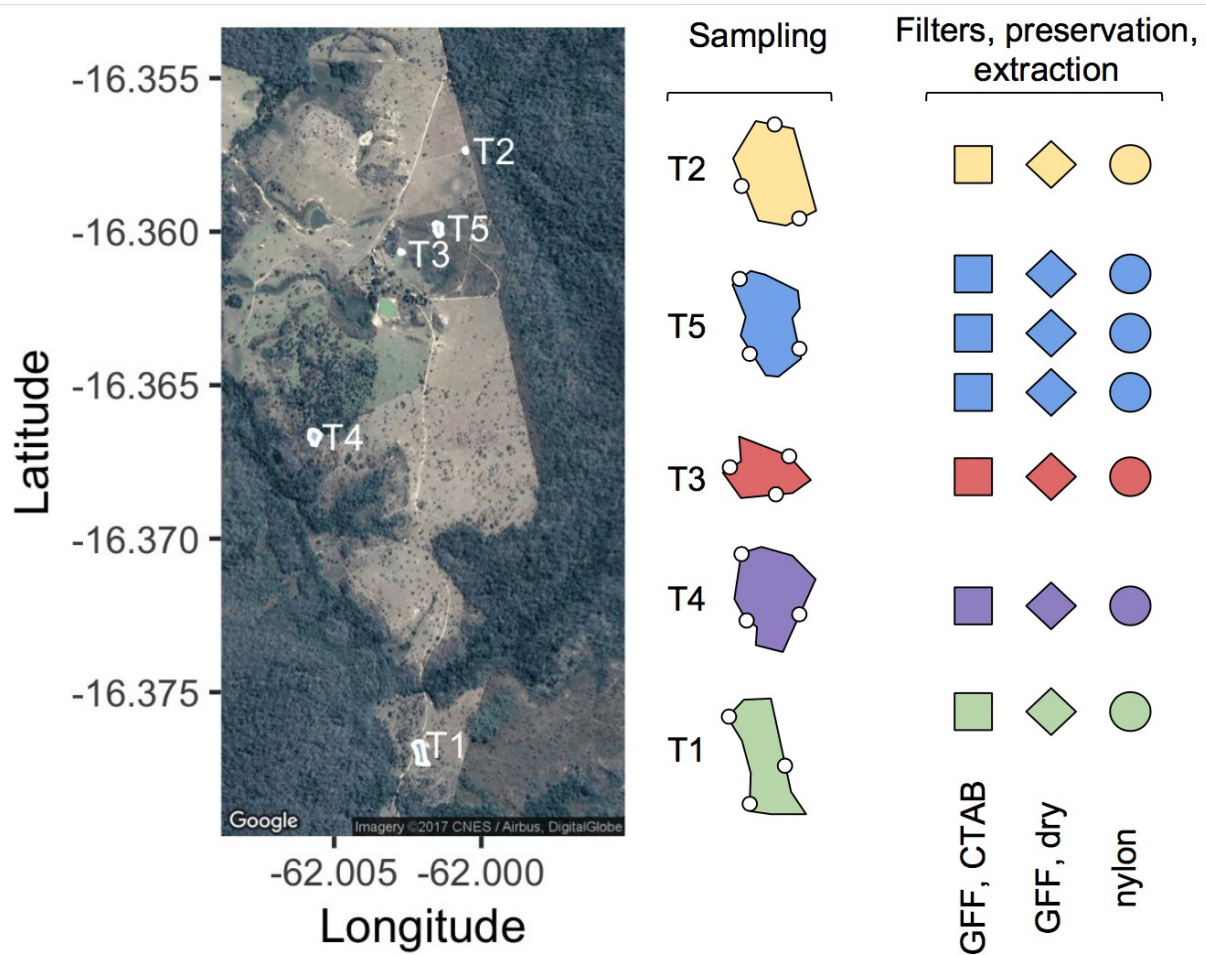

760

761 Fig. 1.

762 Sampled ponds, sampling replication, and filtration - filter preservation strategy. GFF -  
763 glass-fiber filter, 2  $\mu\text{m}$ ; nylon - nylon filter, 0.2  $\mu\text{m}$ . Each sample (three per pond, marked with  
764 small circles) were processed with each three filtration strategies. Multiple samples of pond T5  
765 were three times processed with each filtration strategy.

766

767

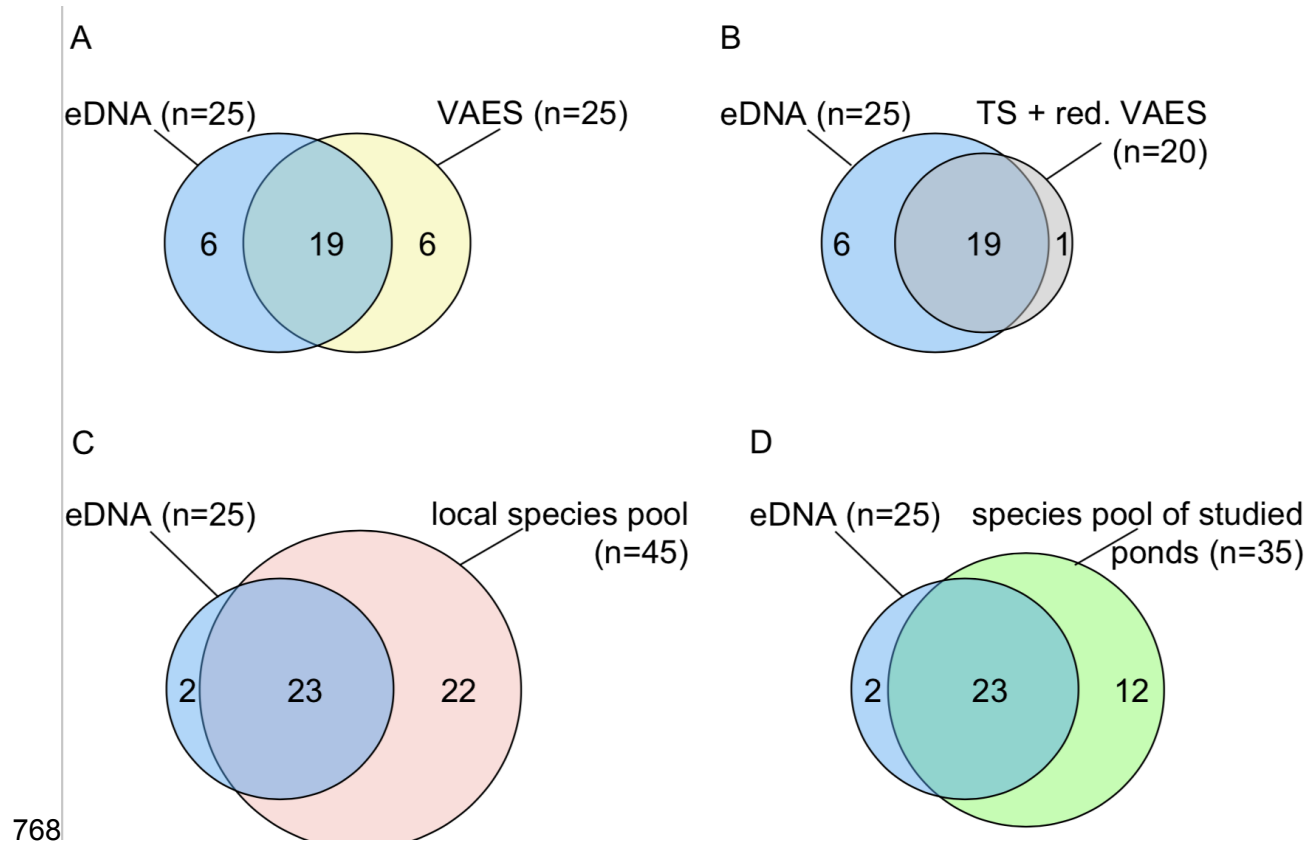

768

769 **Fig. 2.**

770 Comparison of species lists generated by eDNA (blue) and A) visual and audio

771 encounter surveys (VAES, yellow), B) tadpole survey (TS) plus reduced VAES - only species

772 with high eDNA detectability in ponds (see text for details; grey), C) complete local species pool

773 (red), and D) species pool of studied ponds based on long-term monitoring (green).

774

775

776

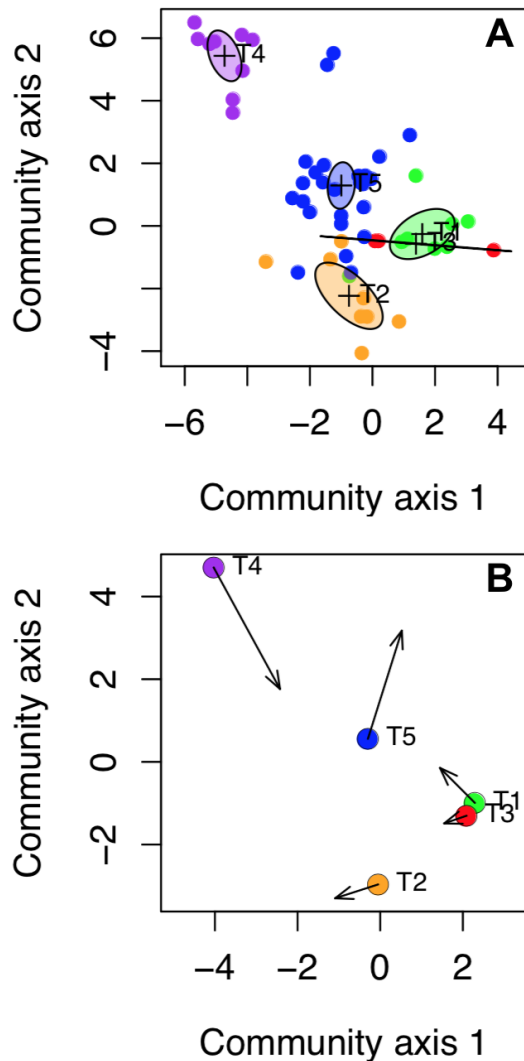

777

778 Fig. 3.

779 Comparison of ecological signal between visual and audio encounter surveys (VAES) and  
780 eDNA metabarcoding surveys. A - Latent variable model ordination of the pond samples  
781 according to the read numbers of species. Water samples from each pond were taken at three  
782 locations. For ponds T1-T4, three samples at each location were filtered through two GFF (A,B),  
783 and one nylon filter (C), resulting in nine samples per pond. For pond T5, each filtration was  
784 done three times. Not all samples contained reads after the bioinformatic quality filtering and  
785 these samples are not shown on the ordination (see e.g. T3 - red). The ellipses represent 95%  
786 confidence intervals for the standard errors of the pond centroids (marked with +). B - Non-



787metric multidimensional scaling plot of the five ponds (Jaccard distance), according to VAES  
788species presence-absences. The arrows represent the Procrustes rotation of the VAES pond  
789ordination and they target the group centroids of the latent variable model ordination.

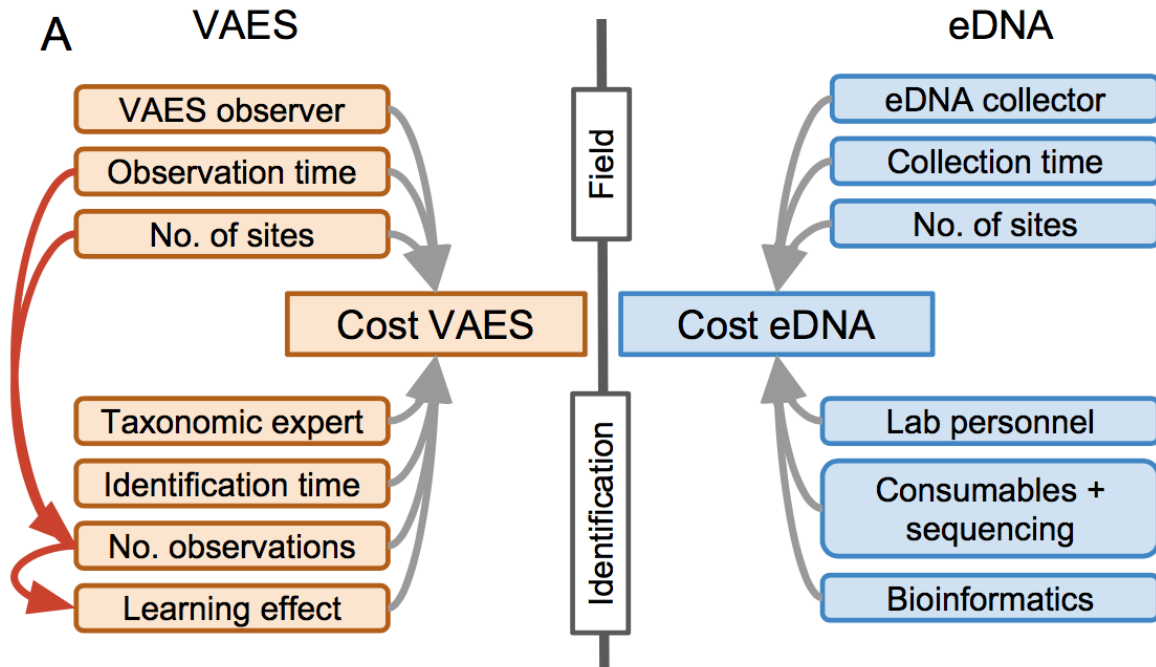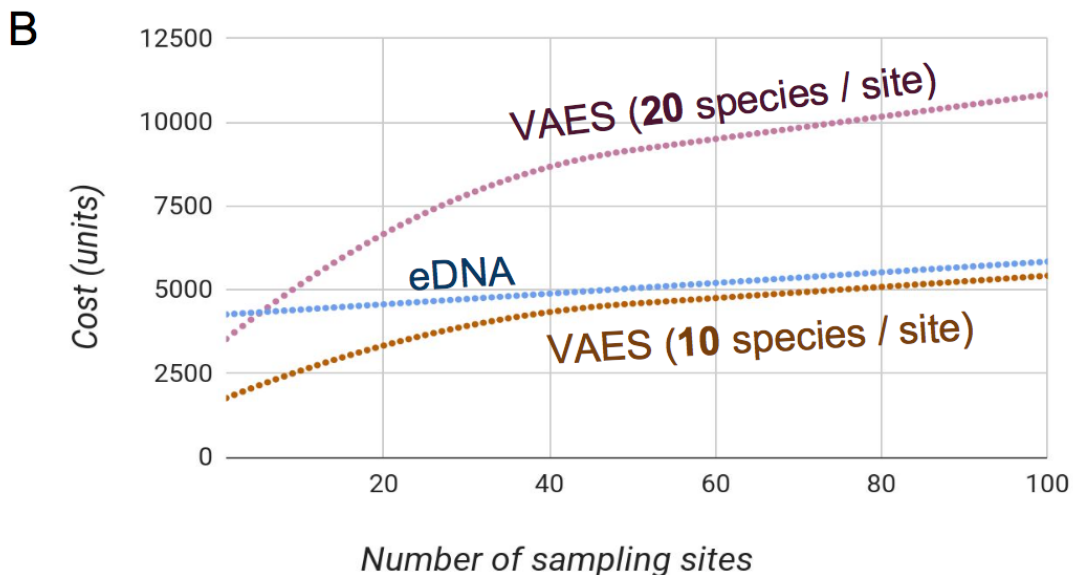

790

791 **Fig. 4.**

792 Cost comparisons between visual and audio encounter surveys (VAES) and eDNA  
793 metabarcoding surveys. A - Schematic overview of the visual and audio encounter survey  
794 (VAES) and eDNA cost models. Model parameters and calculations are accessible through  
795 FigShare (Balint\_et\_al\_survey\_cost\_calculations.xlsx,

796<https://doi.org/10.6084/m9.figshare.5099842.v5>). B - Cost comparisons of frog diversity surveys  
797with eDNA, and two VAES scenarios (a low local species richness scenario - 10 species per  
798site, and a medium-high species richness scenario - 20 species per site).
